# Supplementary material for: Airborne transmission pathway for coastal water pollution
Source: PubMed Central journal article supplement (PMC8191489; doi:10.7717/peerj.11358), 2021-06-07

**Figure S3.** Mean sea surface dye concentrations upwind of aerosol sampling locations. Like Figure 2, for all aerosol samples with data available (day samples). Right: Average sea surface dye concentrations during the period each aerosol sample was collected at the location on land indicated by the triangle. The 200 m x 100 m dotted box indicates where the average wind direction during each sampling interval intersected the coastal waters from the sampling site. Figure 3 finds the location of that box and its mean dye value for each hourly sea surface dye measurement. Here we show the mean dye field during each air sampling period and the mean upwind location (box). Left: wind rose for the winds observed at the KNRS meteorological station during the aerosol sampling periods.

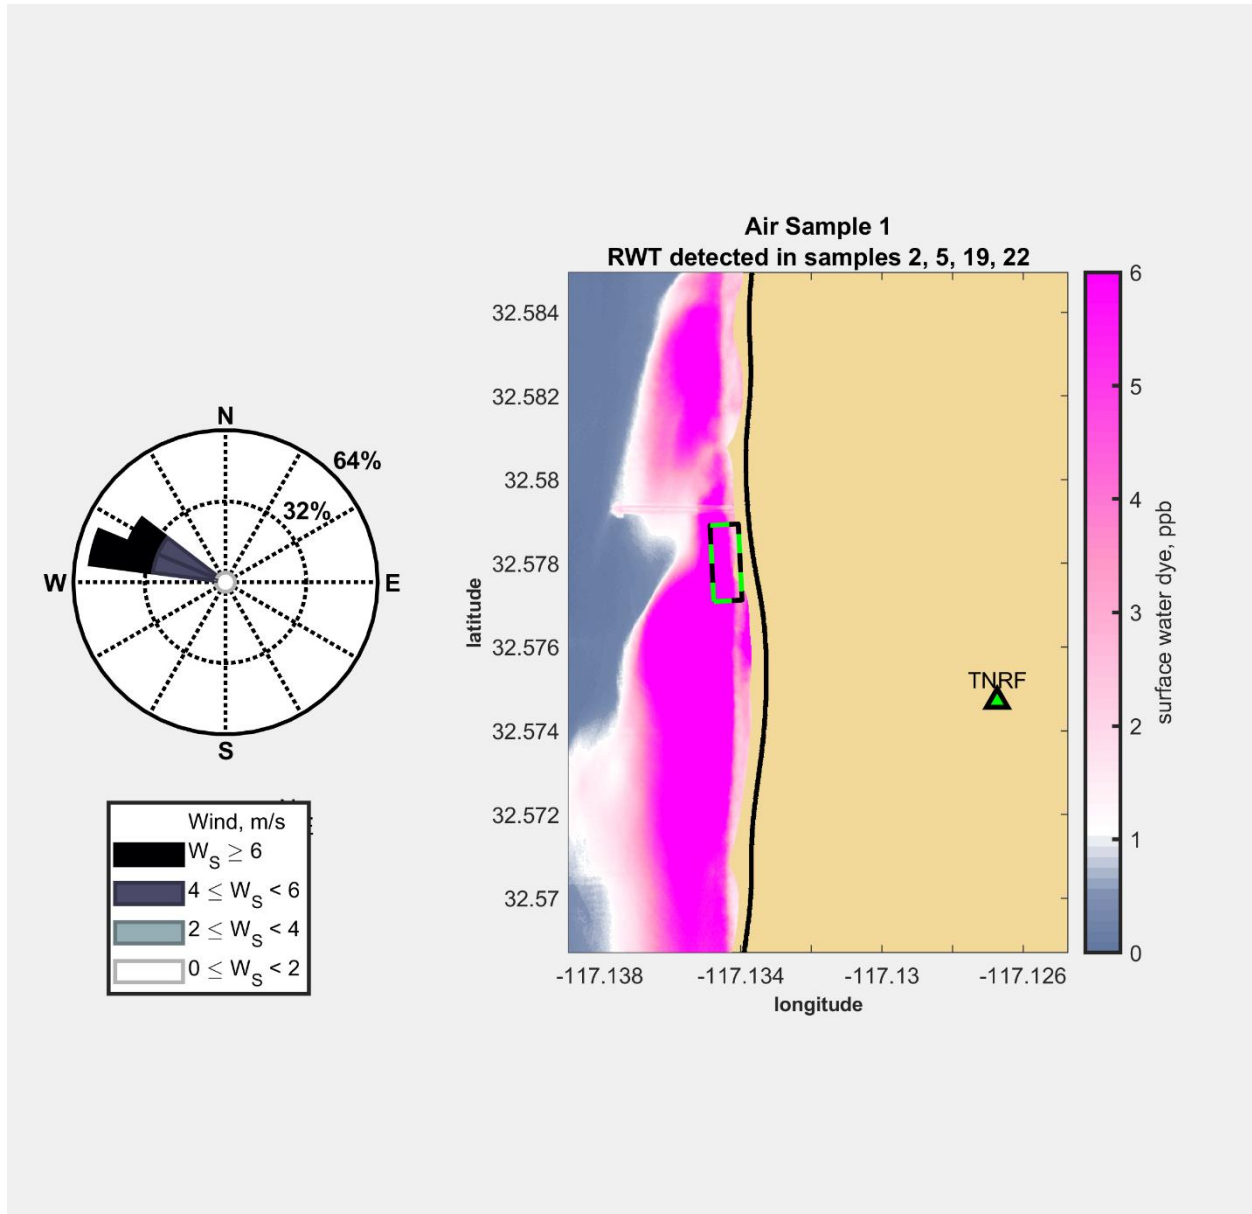

**Air Sample 2**  
**RWT detected in samples 2, 5, 19, 22**

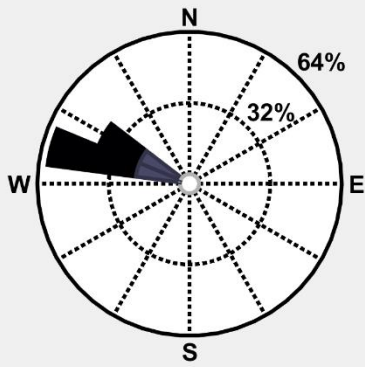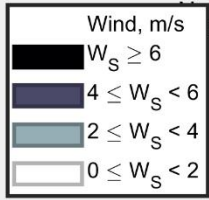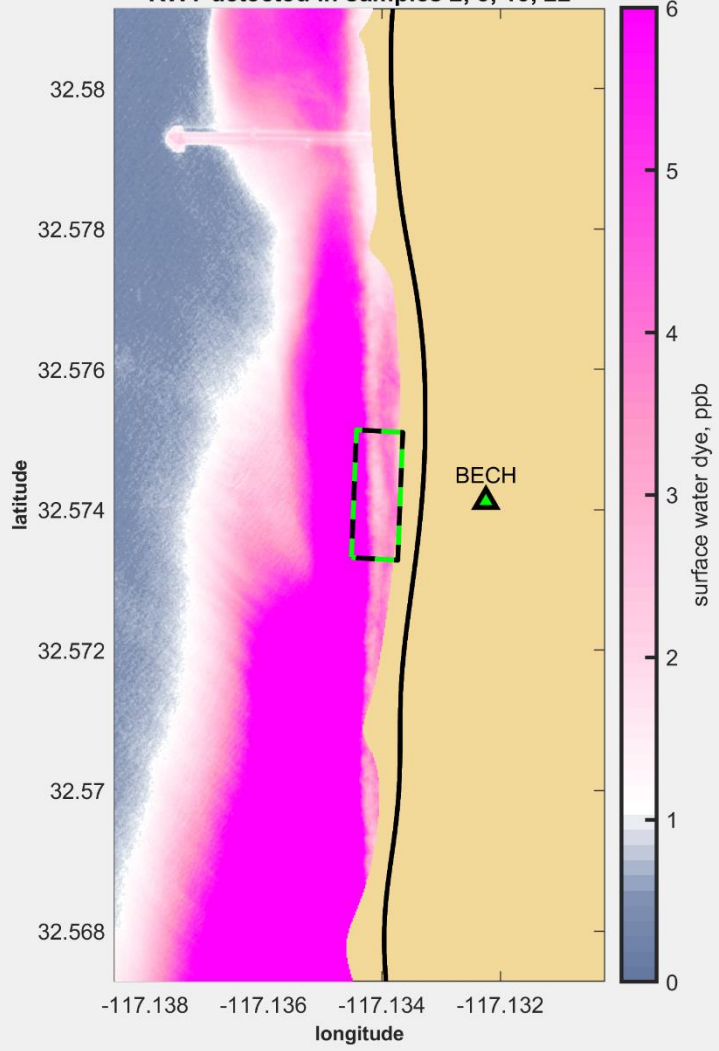

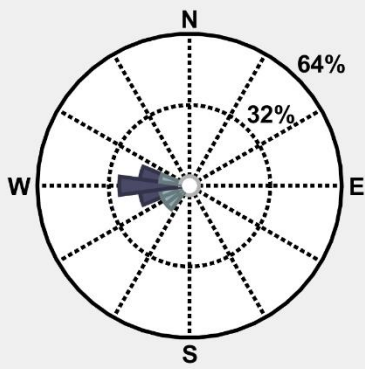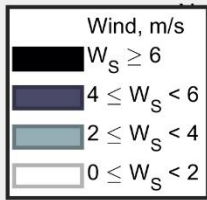

**Air Sample 4**  
**RWT detected in samples 2, 5, 19, 22**

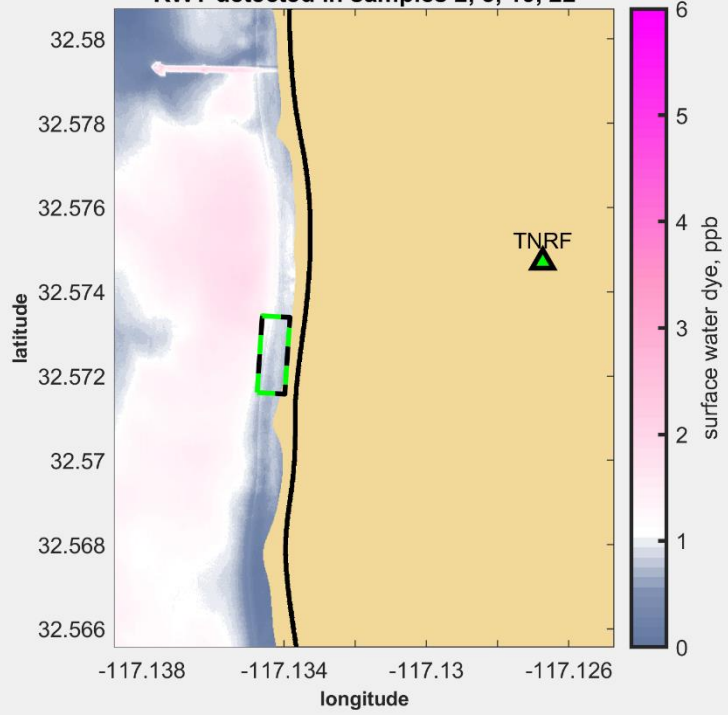

**Air Sample 5**  
**RWT detected in samples 2, 5, 19, 22**

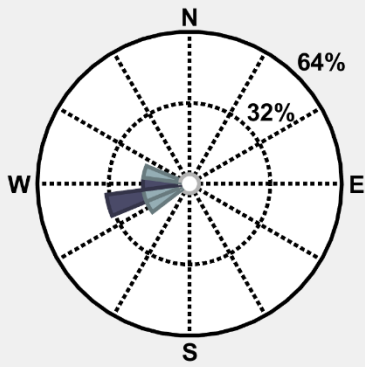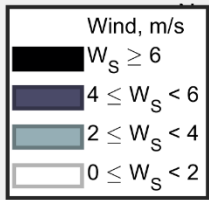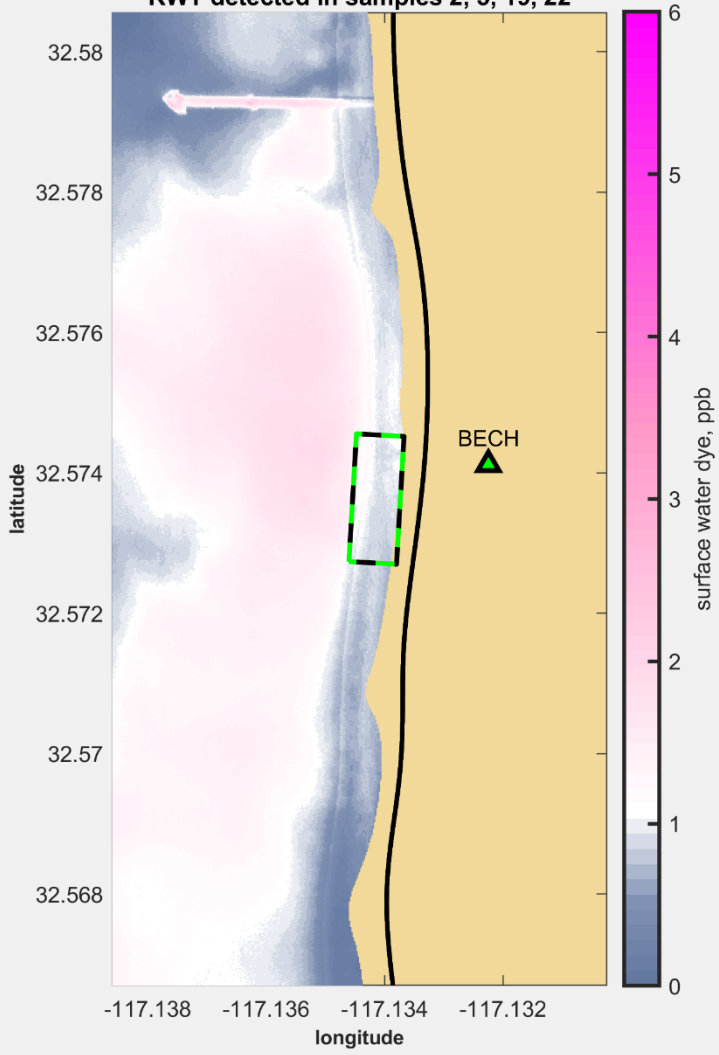

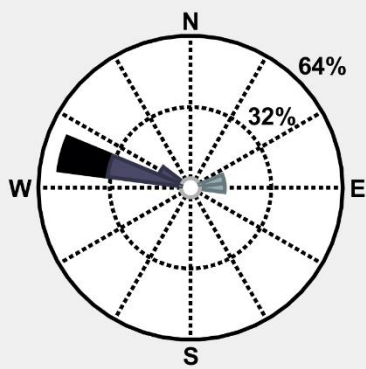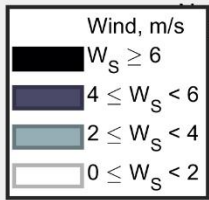

**Air Sample 10**  
**RWT detected in samples 2, 5, 19, 22**

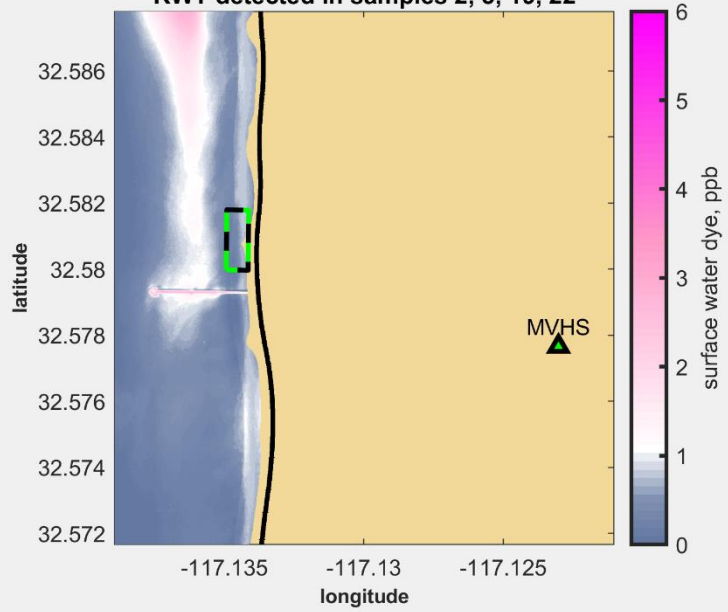

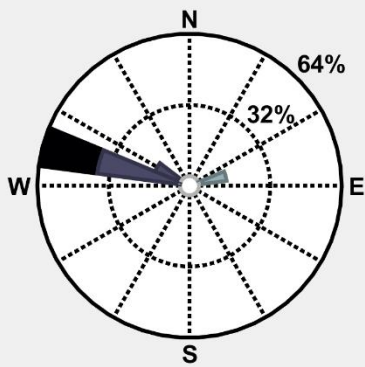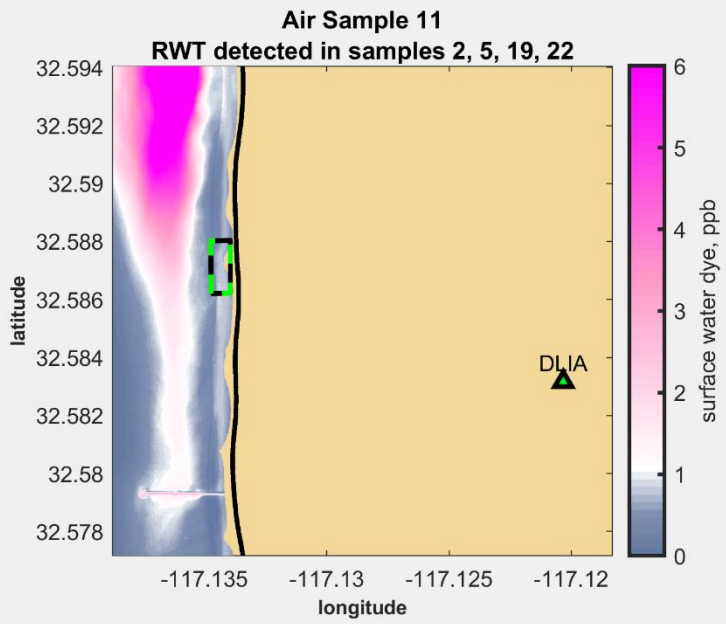

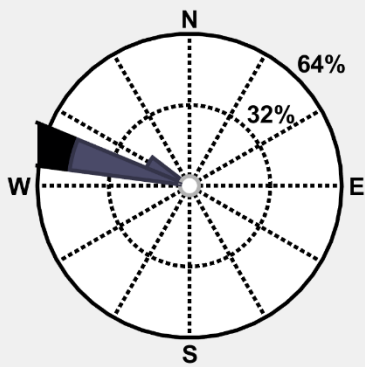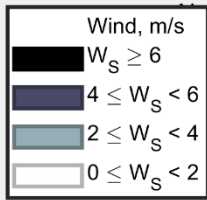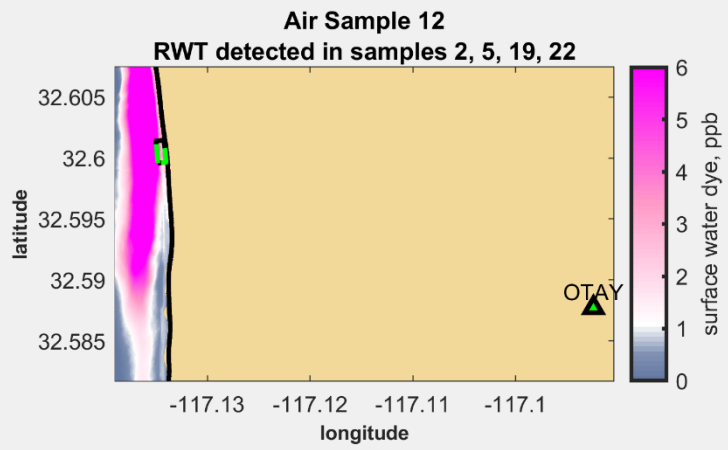

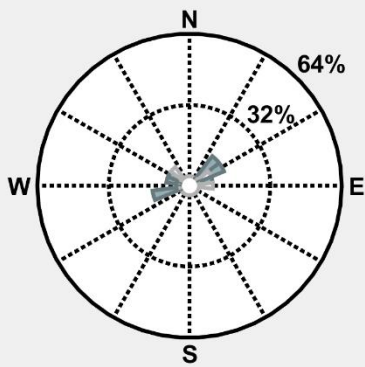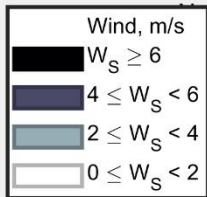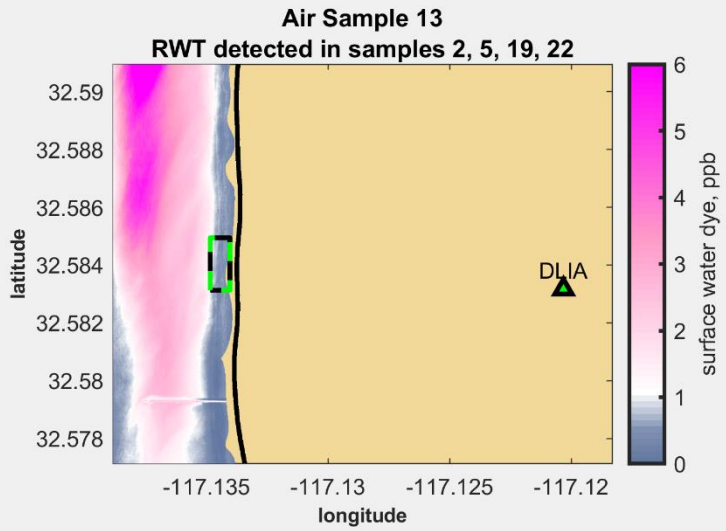



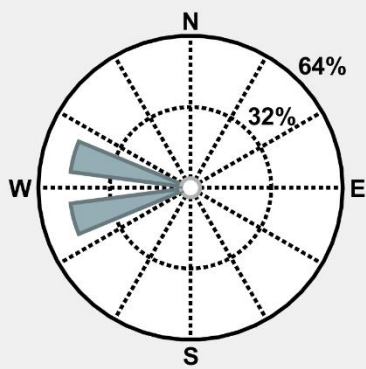

**Air Sample 14**  
**RWT detected in samples 2, 5, 19, 22**

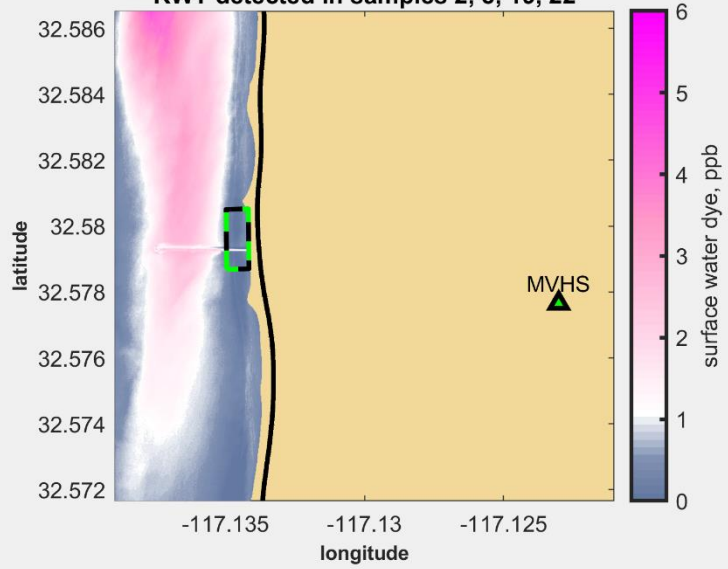

**Air Sample 15**  
**RWT detected in samples 2, 5, 19, 22**

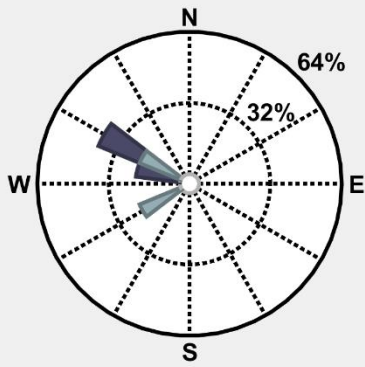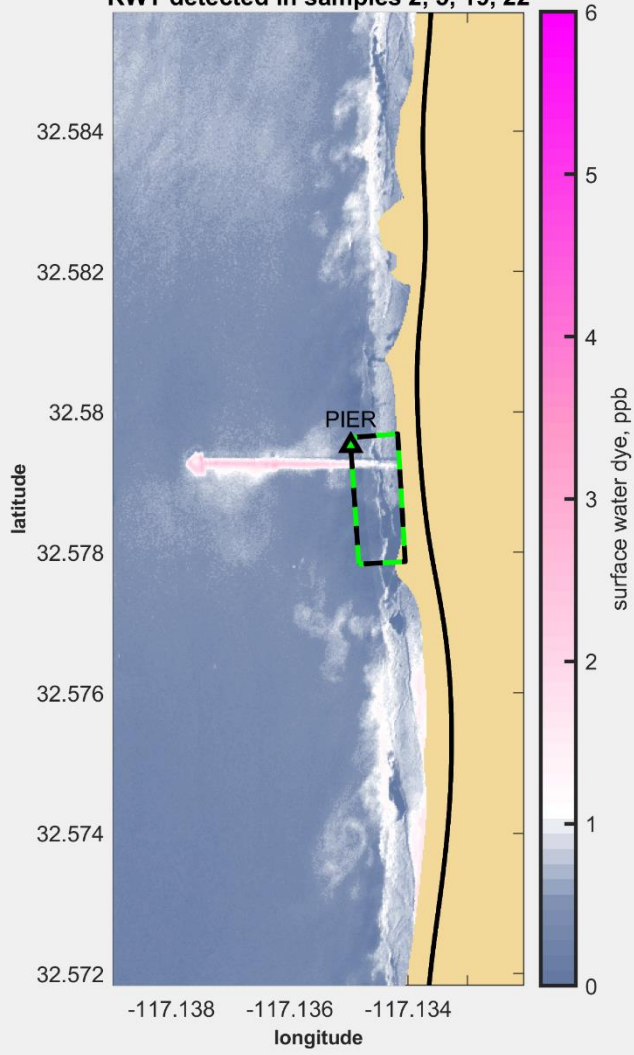

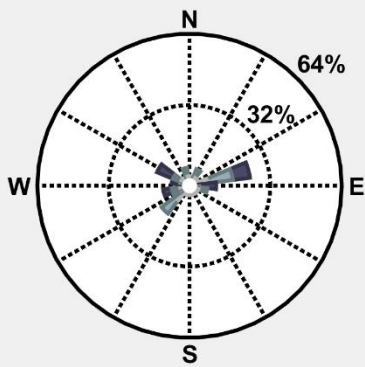

**Air Sample 16**  
**RWT detected in samples 2, 5, 19, 22**

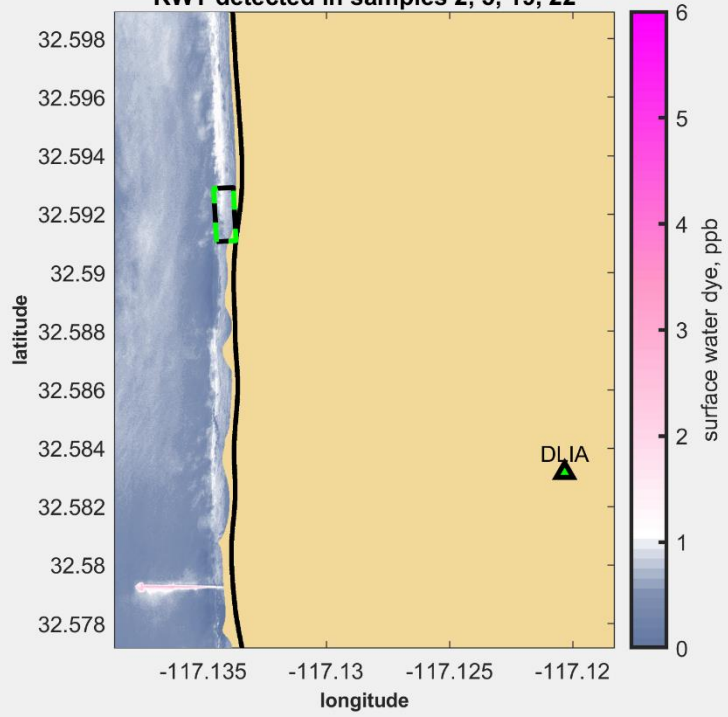

**Air Sample 17**  
**RWT detected in samples 2, 5, 19, 22**

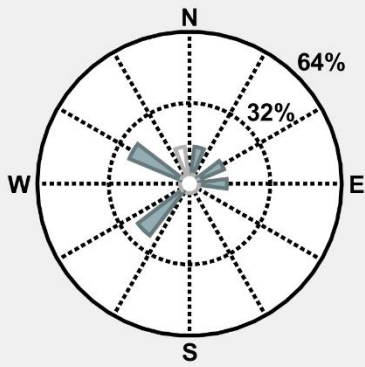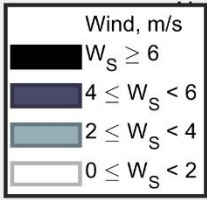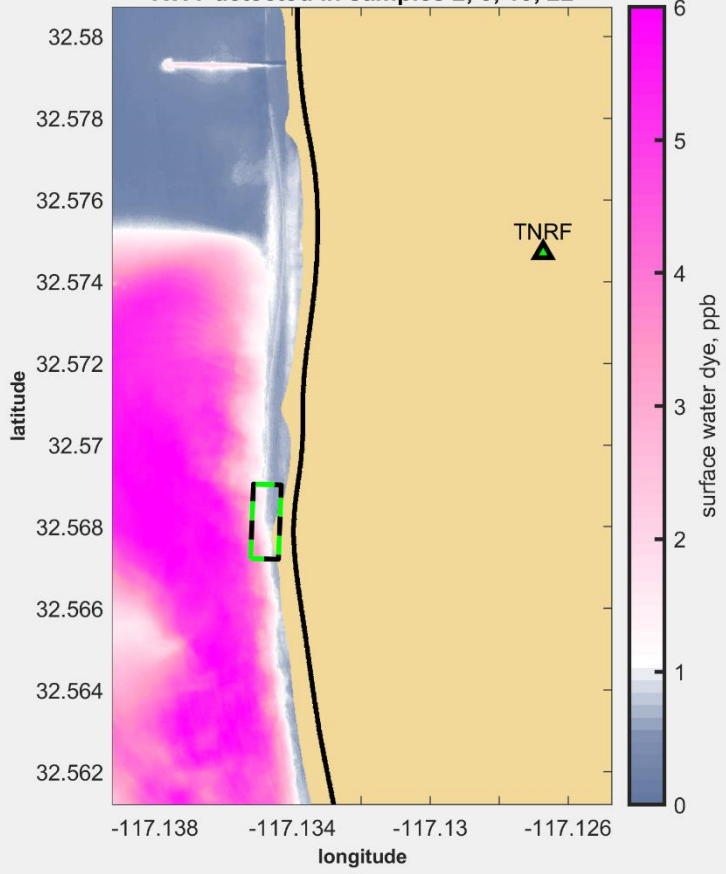

**Air Sample 18**  
RWT detected in samples 2, 5, 19, 22

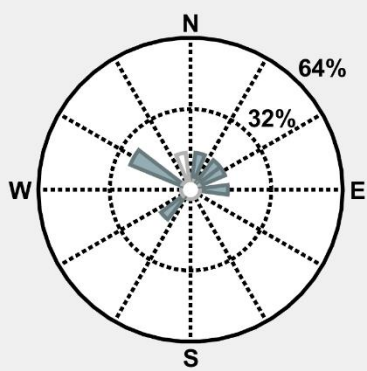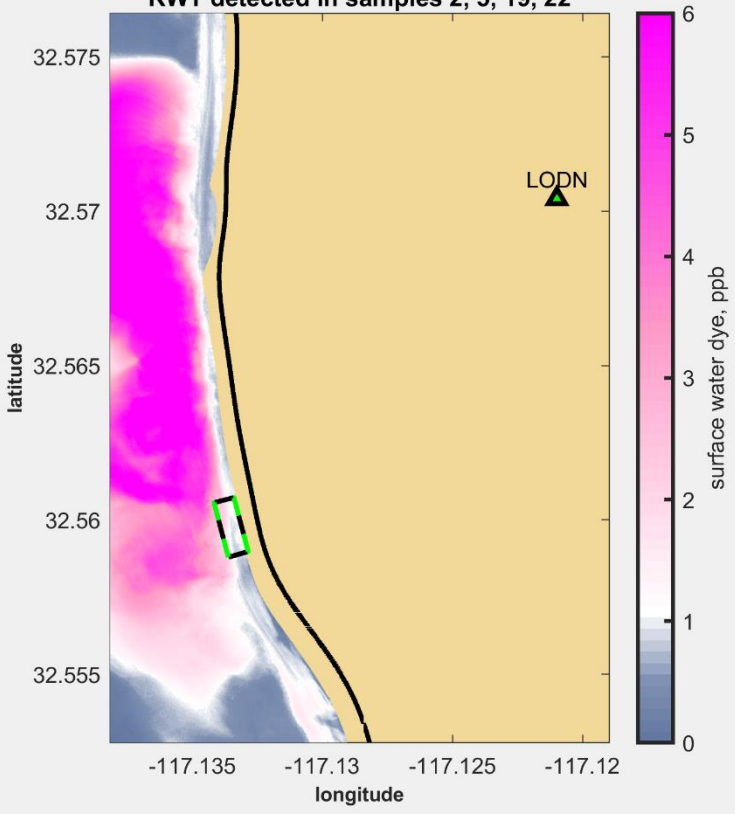

**Air Sample 19**  
**RWT detected in samples 2, 5, 19, 22**

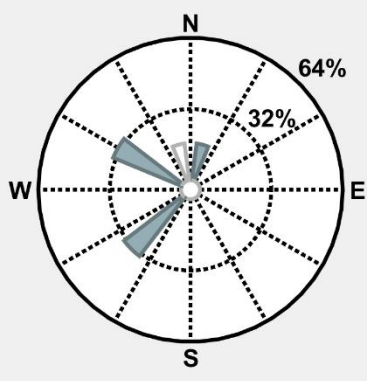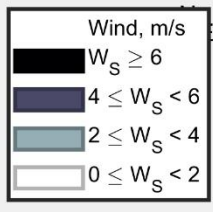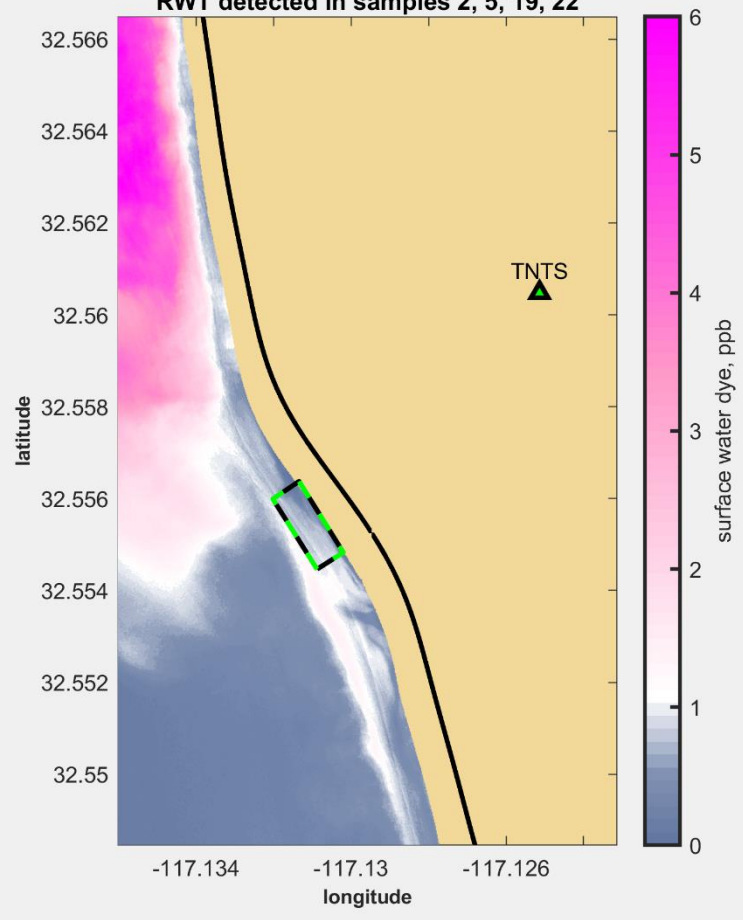

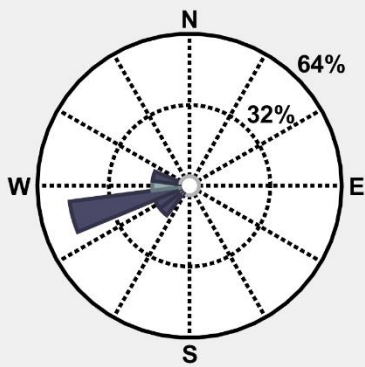

**Air Sample 22**  
**RWT detected in samples 2, 5, 19, 22**

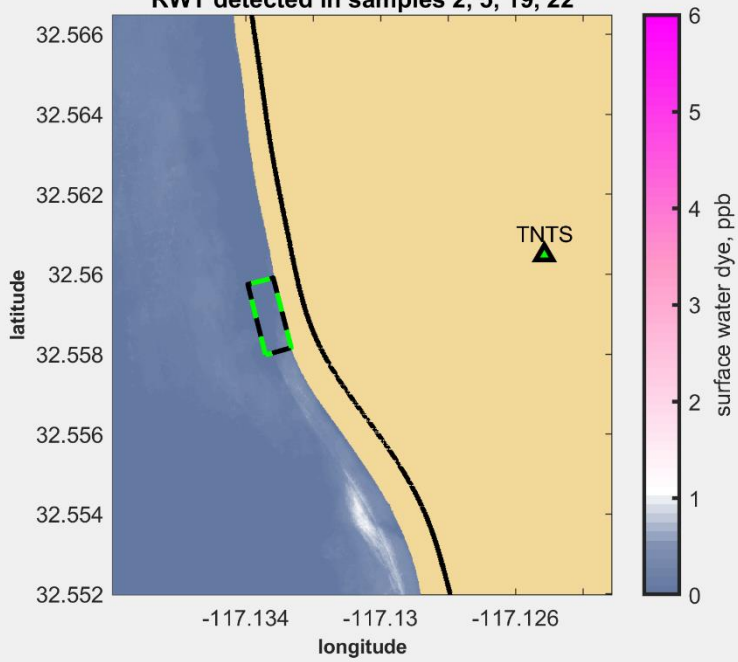

Supplement: peerj-09-11358-s004.pdf [file peerj-09-11358-s004.pdf]
